# Supplementary material for: Enhanced Mutualistic Symbiosis Between Soil Phages and Bacteria With Elevated Chromium-induced Environmental Stress
Source: Research Square preprint supplement (doi:10.21203/rs.3.rs-207906/v1), 2021-02-22
Supplement: Supplementary file 2 [file b3765cd3821755e778101af4.docx]

**Supporting Information**

**Enhanced Mutualistic Symbiosis between Soil Phages and Bacteria with Elevated Chromium-Induced Environmental Stress**

Dan Huang1, 2, Pingfeng Yu3, *, Mao Ye1, *, Cory Schwarz3, Xin Jiang1, Pedro J.J. Alvarez3

1 Key Laboratory of Soil Environment and Pollution Remediation, Institute of Soil Science, Chinese Academy of Sciences, Nanjing 210008, PR China

2 University of Chinese Academy of Sciences, Beijing 100049, PR China

3 Department of Civil and Environmental Engineering, Rice University, Houston, 77005, United States

* Corresponding Authors: [pingfeng.yu@rice.edu](mailto:pingfeng.yu@rice.edu) (P. Yu), yemao@issas.ac.cn (M. Ye)

**This** **supporting information includes 5 tables.**

Table S1. Physical chemical parameters of the soil samples.

Table S2. Integrase family genes (annotated using PFAM)

Table S3. Membrane transporter genes (annotated using KEGG).

Table S4. Reductase genes (annotated using KEGG).

Table S5. Specific information on protein annotation of four lysogenic phages.

**Table S1.** Physical chemical parameters of the soil samples

| Sample | Nitrate nitrogen | Ammonium nitrogen | pH | The organic matter | Total nitrogen | Total phosphorus | Total potassium | Alkaline hydrolysis nitrogen | Available phosphorus | Available potassium | Cadmium |
| --- | --- | --- | --- | --- | --- | --- | --- | --- | --- | --- | --- |
| mg/kg | mg/kg | g/kg | g/kg | g/kg | g/kg | mg/kg | mg/kg | mg/kg | mg/kg |
| L1 | 18.47 | 8.85 | 6.38 | 6.92 | 0.17 | 0.65 | 20.03 | 14.70 | 4.99 | 82.50 | 0.12 |
| L2 | 16.11 | 10.33 | 8.15 | 28.10 | 1.37 | 0.57 | 19.84 | 95.55 | 27.89 | 140.00 | 0.71 |
| L3 | 2.46 | 5.28 | 7.70 | 1.67 | 0.68 | 0.35 | 19.37 | 77.18 | 12.33 | 85.00 | 0.31 |
| Z1 | 15.07 | 5.58 | 8.89 | 14.57 | 0.89 | 0.85 | 21.07 | 40.43 | 13.17 | 190.00 | 0.25 |
| Z2 | 2.74 | 4.91 | 8.86 | 4.69 | 0.33 | 0.79 | 20.63 | 14.70 | 8.09 | 137.50 | 0.22 |
| Z3 | 0.94 | 5.55 | 8.85 | 2.72 | 0.21 | 0.64 | 19.51 | 18.38 | 5.18 | 112.50 | 0.17 |
| Z4 | 0.82 | 3.78 | 8.95 | 2.24 | 0.063 | 0.66 | 19.29 | 13.73 | 3.49 | 117.92 | 0.18 |
| Sample | CEC | DOC | Available sulfur | Total Chromium ( T Cr) | Available Cr | Available Cr(VI) | Particles（%） | | | Soil type | |
| cmol/kg | mg/kg | mg/kg | mg/kg | mg/kg | mg/kg | 2-0.05mm | 0.05-0.002mm | <0.002mm | US Standard | |
| L1 | 14.92 | 207.56 | 159.22 | 44.92 | 0.11 | 0.04 | 64.69 | 27.11 | 8.21 | Sandy loam | |
| L2 | 12.99 | 191.86 | 19.79 | 391.27 | 0.27 | 0.12 | 62.77 | 27.71 | 9.52 | Sandy loam | |
| L3 | 11.37 | 40.12 | 12.72 | 261.27 | 6.76 | 6.64 | 70.71 | 15.00 | 14.29 | Sandy loam | |
| Z1 | 8.02 | 62.79 | 38.10 | 374.27 | 0.91 | 0.13 | 13.86 | 72.64 | 13.50 | Silt loam | |
| Z2 | 6.29 | 34.88 | 303.76 | 91.94 | 6.09 | 5.84 | 15.18 | 74.92 | 9.89 | Silt loam | |
| Z3 | 5.18 | 27.91 | 383.34 | 644.57 | 413.84 | 361.60 | 19.38 | 72.11 | 8.51 | Silt loam | |
| Z4 | 4.96 | 26.97 | 369.43 | 896.15 | 465.42 | 449.17 | 20.71 | 59.50 | 19.79 | Silt loam | |

Note: Horizontal gradients of physicochemical properties were observed in both the LZ and ZY sites from the edge of detectable contamination to the epicenter of the Cr-contamination (show in **Fig.S1**). The concentrations of available Cr (defined as the total of exchangeable and soluble Cr) of taken samples were 0.11, 0.27, and 6.76 mg/kg in L1, L2, and L3 locations of LZ site, respectively (**Table S1**). The corresponding concentrations of available Cr were 0.91, 6.09, 413.84, and 465.42 mg/kg in Z1, Z2, Z3 and Z4 locations of ZY site, respectively (**Table S1**). Specifically, Cr (VI), which has been shown to have general biological toxicity, was the dominant species of Cr, and the concentrations of Cr (VI) and available Cr were highly positively correlated (R2 = 0.99, *p* < 0.01) (**Table S1**). Consistently, a decreasing gradient of total nitrogen, total organic matter, and total phosphorus were also observed from the edge of the contaminated site to the center (**Table S1**). Based on the Cr pollution level and nutrient conditions, these seven samples can be roughly divided into three groups: a slightly-contaminated group (L1, L2 and Z1), a moderately-contaminated group (L3 and Z2) and a severely-contaminated group (Z3 and Z4).

**Table S2.** Integrase family genes (annotated using PFAM)

| [PF00552](https://pfam.xfam.org/family?acc=PF00552) | PF14659 | PF13683 | PF14882 | PF13009 |
| --- | --- | --- | --- | --- |
| PF00589 | PF13102 | PF07935 | PF12167 | PF14657 |
| PF00665 | PF13356 | PF09299 | PF12482 | PF13333 |
| PF02022 | PF16795 | PF12834 | PF18644 | PF13495 |
| PF02899 | PF17921 | PF12835 | PF18103 | PF09003 |
| PF02920 | PF18697 |  |  |  |

**Table S3.** Membrane transportor genes (annotated using KEGG)

| K01531 | K08151 | K08227 | K14696 | K17470 | K18936 | K07507 | K08220 | K14688 | K14718 | K18552 | K23254 | K01997 | K15555 |
| --- | --- | --- | --- | --- | --- | --- | --- | --- | --- | --- | --- | --- | --- |
| K01533 | K08152 | K08228 | K14697 | K17471 | K18989 | K07552 | K08221 | K14689 | K14719 | K18553 | K03322 | K01996 | K02073 |
| K01536 | K08153 | K08229 | K14700 | K17686 | K19364 | K07783 | K08222 | K14690 | K14720 | K18567 | K02051 | K01995 | K03523 |
| K01537 | K08154 | K08230 | K14701 | K18059 | K19478 | K07784 | K08223 | K11939 | K14990 | K18728 | K02044 | K01999 | K16783 |
| K02575 | K08156 | K08231 | K14702 | K18070 | K19541 | K07785 | K08169 | K12201 | K15102 | K23329 | K01990 | K02020 | K16784 |
| K02598 | K08157 | K08368 | K14704 | K18095 | K19542 | K07786 | K08170 | K12346 | K15113 | K23361 | K01992 | K07793 | K02071 |
| K03284 | K08158 | K08369 | K14706 | K18138 | K19552 | K05853 | K08171 | K13021 | K15115 | K23448 | K13896 | K07794 | K02072 |
| K03291 | K08159 | K08970 | K14708 | K18142 | K19576 | K06157 | K08172 | K13283 | K18833 | K23566 | K13895 | K07795 | K02047 |
| K03298 | K08160 | K08978 | K14709 | K18146 | K19577 | K06189 | K08173 | K13629 | K18887 | K23677 | K13894 | K11073 | K02045 |
| K03305 | K08161 | K09125 | K14710 | K18214 | K19578 | K06213 | K08174 | K15268 | K18888 | K24107 | K13893 | K07222 | K17207 |
| K03306 | K08162 | K09936 | K14711 | K18215 | K19585 | K06609 | K08175 | K15548 | K18889 | K24193 | K11103 | K11076 | K17205 |
| K03444 | K08163 | K10850 | K14712 | K18218 | K19594 | K06610 | K14430 | K16073 | K18890 | K24194 | K02067 | K11075 | K17206 |
| K03445 | K08164 | K11382 | K14713 | K18296 | K19646 | K06902 | K14637 | K16074 | K18891 | K21134 | K02066 | K11074 | K02030 |
| K03446 | K08165 | K11537 | K14714 | K18299 | K21133 | K08176 | K14638 | K16075 | K18892 | K18322 | K02013 | K03561 | K02052 |
| K03448 | K08166 | K11639 | K14715 | K18303 | K07122 | K08177 | K14640 | K16092 | K18893 | K22134 | K02015 | K03559 | K02053 |
| K03468 | K08167 | K11737 | K14716 | K18307 | K07191 | K08178 | K14683 | K16267 | K18894 | K22733 | K02016 | K02004 | K02054 |
| K05557 | K08168 | K11810 | K14717 | K18908 | K07238 | K08197 | K14684 | K16302 | K18899 | K22736 | K02000 | K02003 | K02055 |
| K05850 | K08224 | K14691 | K16788 | K18926 | K07240 | K08217 | K14685 | K16322 | K18902 | K23088 | K02001 | K02048 | K07225 |
| K07788 | K08225 | K14693 | K16789 | K18934 | K07241 | K08218 | K14686 | K16324 | K18324 | K23241 | K02002 | K15553 | K06076 |
| K07789 | K08226 | K14695 | K17469 | K18935 | K07243 | K08219 | K14687 | K16327 | K18326 | K23242 | K01998 | K15554 | K18480 |
| K02017 | K11535 | K03811 | K09690 | K20361 | K02043 | K07862 | K11734 | K02050 | K10126 | K10125 | K02029 | K02028 | K02049 |
| K02018 | K02019 | K03560 | K03562 | K17324 | K17325 | K17322 | K06214 | K04338 | K04337 | K11069 | K11070 | K11071 | K11072 |
| K10439 | K10441 | K10440 | K14347 | K17321 | K17323 |  |  |  |  |  |  |  |  |

**Table S4.** Reductase genes (annotated using KEGG)

| K15977 | K00342 | K17725 | K03951 | K03880 | K01118 | K00330 | K03968 | K11351 | K12972 | K13985 | K03939 | K03961 | K22470 |
| --- | --- | --- | --- | --- | --- | --- | --- | --- | --- | --- | --- | --- | --- |
| K00384 | K00341 | K12264 | K03942 | K03882 | K03611 | K09765 | K11353 | K11166 | K00528 | K00784 | K14737 | K03878 | K03949 |
| K00287 | K00340 | K08364 | K09008 | K03881 | K10680 | K09024 | K00383 | K11148 | K02164 | K06897 | K11170 | K03879 | K22182 |
| K00058 | K00339 | K11167 | K03947 | K03883 | K00297 | K06988 | K03937 | K18162 | K03673 | K14403 | K05361 | K07232 | K03956 |
| K00208 | K00338 | K11149 | K07305 | K03884 | K00077 | K14738 | K03950 | K03966 | K00067 | K16639 | K00121 | K01800 | K03946 |
| K00299 | K00337 | K14618 | K11147 | K00432 | K11209 | K14737 | K03959 | K03953 | K11752 | K01069 | K21456 | K01070 | K22366 |
| K00411 | K00336 | K03934 | K03935 | K01013 | K00344 | K10142 | K03944 | K03940 | K18979 | K00415 | K23790 | K00681 | K03952 |
| K00412 | K00335 | K00418 | K00381 | K00332 | K00380 | K19876 | K11164 | K00327 | K19784 | K00331 | K07007 | K00333 | K03958 |
| K00413 | K00334 | K00326 |  |  |  |  |  |  |  |  |  |  |  |

**Table S5.** Protein information of 4 viral contigs containing integrase genes (annotated by RAST)

| Contig VC-2 | | | | | | | | |
| --- | --- | --- | --- | --- | --- | --- | --- | --- |
| Feature ID | Type | Contig | Start | Stop | Frame | Strand | Length (bp) | Function |
| fig|6666666.691807.peg.1 | CDS | VC-2 | 3 | 146 | 3 | + | 144 | Glutathione-regulated potassium-efflux system protein KefC |
| fig|6666666.691807.peg.2 | CDS | VC-2 | 1047 | 157 | -3 | - | 891 | Transcriptional regulator, LysR family |
| fig|6666666.691807.peg.3 | CDS | VC-2 | 1094 | 1753 | 2 | + | 660 | Short-chain dehydrogenase |
| fig|6666666.691807.peg.4 | CDS | VC-2 | 1831 | 2289 | 1 | + | 459 | hypothetical protein |
| fig|6666666.691807.peg.5 | CDS | VC-2 | 3039 | 2365 | -3 | - | 675 | Putative periplasmic cytochrome type-C oxidoreductase signal peptide protein (EC 1.-.-.-) |
| fig|6666666.691807.peg.6 | CDS | VC-2 | 3156 | 4010 | 3 | + | 855 | ATPase associated with various cellular activities, AAA_5 |
| fig|6666666.691807.peg.7 | CDS | VC-2 | 4019 | 4753 | 2 | + | 735 | Acetyltransferase, GNAT family |
| fig|6666666.691807.peg.8 | CDS | VC-2 | 4785 | 5972 | 3 | + | 1188 | VWA containing CoxE family protein |
| fig|6666666.691807.peg.9 | CDS | VC-2 | 6025 | 7899 | 1 | + | 1875 | Outer membrane component of TAM transport system |
| fig|6666666.691807.peg.10 | CDS | VC-2 | 7902 | 12221 | 3 | + | 4320 | Inner membrane component of TAM transport system |
| fig|6666666.691807.peg.11 | CDS | VC-2 | 12912 | 13058 | 3 | + | 147 | hypothetical protein |
| fig|6666666.691807.peg.12 | CDS | VC-2 | 14151 | 13114 | -3 | - | 1038 | Phage portal vertex protein GpQ |
| fig|6666666.691807.peg.13 | CDS | VC-2 | 16037 | 14148 | -2 | - | 1890 | Phage terminase, ATPase subunit GpP |
| fig|6666666.691807.peg.14 | CDS | VC-2 | 16157 | 17002 | 2 | + | 846 | Phage capsid scaffolding protein GpO |
| fig|6666666.691807.peg.15 | CDS | VC-2 | 17054 | 18064 | 2 | + | 1011 | Phage major capsid protein GpN |
| fig|6666666.691807.peg.16 | CDS | VC-2 | 18147 | 18866 | 3 | + | 720 | Phage terminase, endonuclease subunit GpM |
| fig|6666666.691807.peg.17 | CDS | VC-2 | 18975 | 19460 | 3 | + | 486 | Phage head completion protein |
| fig|6666666.691807.peg.18 | CDS | VC-2 | 19463 | 19687 | 2 | + | 225 | hypothetical protein |
| fig|6666666.691807.peg.19 | CDS | VC-2 | 19689 | 19940 | 3 | + | 252 | hypothetical protein |
| fig|6666666.691807.peg.20 | CDS | VC-2 | 19937 | 20521 | 2 | + | 585 | Phage lysozyme R (EC 3.2.1.17) |
| fig|6666666.691807.peg.21 | CDS | VC-2 | 20518 | 21099 | 1 | + | 582 | hypothetical protein |
| fig|6666666.691807.peg.22 | CDS | VC-2 | 21101 | 21637 | 2 | + | 537 | Phage tail completion protein GpR |
| fig|6666666.691807.peg.23 | CDS | VC-2 | 21641 | 22111 | 2 | + | 471 | hypothetical protein |
| fig|6666666.691807.peg.24 | CDS | VC-2 | 22182 | 22790 | 3 | + | 609 | Baseplate assembly protein V |
| fig|6666666.691807.peg.25 | CDS | VC-2 | 22787 | 23143 | 2 | + | 357 | Phage baseplate assembly protein |
| fig|6666666.691807.peg.26 | CDS | VC-2 | 23140 | 23994 | 1 | + | 855 | Phage baseplate assembly protein GpJ |
| fig|6666666.691807.peg.27 | CDS | VC-2 | 23994 | 24941 | 3 | + | 948 | hypothetical protein |
| fig|6666666.691807.peg.28 | CDS | VC-2 | 24945 | 25433 | 3 | + | 489 | hypothetical protein |
| fig|6666666.691807.peg.29 | CDS | VC-2 | 25441 | 27594 | 1 | + | 2154 | hypothetical protein |
| fig|6666666.691807.peg.30 | CDS | VC-2 | 27584 | 28618 | 2 | + | 1035 | hypothetical protein |
| fig|6666666.691807.peg.31 | CDS | VC-2 | 28630 | 29346 | 1 | + | 717 | hypothetical protein |
| fig|6666666.691807.peg.32 | CDS | VC-2 | 29350 | 30147 | 1 | + | 798 | hypothetical protein |
| fig|6666666.691807.peg.33 | CDS | VC-2 | 30150 | 30578 | 3 | + | 429 | hypothetical protein |
| fig|6666666.691807.peg.34 | CDS | VC-2 | 30746 | 31942 | 2 | + | 1197 | Phage tail sheath monomer GpFI |
| fig|6666666.691807.peg.35 | CDS | VC-2 | 31979 | 32488 | 2 | + | 510 | Phage major tail tube protein GpFII |
| fig|6666666.691807.peg.36 | CDS | VC-2 | 32623 | 32988 | 1 | + | 366 | hypothetical protein |
| fig|6666666.691807.peg.37 | CDS | VC-2 | 32997 | 33122 | 3 | + | 126 | hypothetical protein |
| fig|6666666.691807.peg.38 | CDS | VC-2 | 33115 | 35619 | 1 | + | 2505 | hypothetical protein |
| fig|6666666.691807.peg.39 | CDS | VC-2 | 35632 | 36096 | 1 | + | 465 | Phage tape measure |
| fig|6666666.691807.peg.40 | CDS | VC-2 | 36096 | 37175 | 3 | + | 1080 | Gene D protein |
| fig|6666666.691807.peg.41 | CDS | VC-2 | 37229 | 37495 | 2 | + | 267 | hypothetical protein |
| fig|6666666.691807.peg.42 | CDS | VC-2 | 37500 | 37772 | 3 | + | 273 | hypothetical protein |
| fig|6666666.691807.peg.43 | CDS | VC-2 | 37795 | 38184 | 1 | + | 390 | hypothetical protein |
| fig|6666666.691807.peg.44 | CDS | VC-2 | 38265 | 38585 | 3 | + | 321 | hypothetical protein |
| fig|6666666.691807.peg.45 | CDS | VC-2 | 38582 | 39457 | 2 | + | 876 | hypothetical protein |
| fig|6666666.691807.peg.46 | CDS | VC-2 | 39467 | 39712 | 2 | + | 246 | hypothetical protein |
| fig|6666666.691807.peg.47 | CDS | VC-2 | 39871 | 39719 | -1 | - | 153 | hypothetical protein |
| fig|6666666.691807.peg.48 | CDS | VC-2 | 40400 | 39927 | -2 | - | 474 | hypothetical protein |
| fig|6666666.691807.peg.49 | CDS | VC-2 | 41459 | 40494 | -2 | - | 966 | hypothetical protein |
| fig|6666666.691807.peg.50 | CDS | VC-2 | 42093 | 41521 | -3 | - | 573 | Transcriptional regulator, Xre family |
| fig|6666666.691807.peg.51 | CDS | VC-2 | 42176 | 42430 | 2 | + | 255 | hypothetical protein |
| fig|6666666.691807.peg.52 | CDS | VC-2 | 42441 | 42989 | 3 | + | 549 | Phage transcriptional activator Ogr/delta (ACLAME 74) |
| fig|6666666.691807.peg.53 | CDS | VC-2 | 43105 | 43515 | 1 | + | 411 | hypothetical protein |
| fig|6666666.691807.peg.54 | CDS | VC-2 | 43512 | 43670 | 3 | + | 159 | hypothetical protein |
| fig|6666666.691807.peg.55 | CDS | VC-2 | 43667 | 44080 | 2 | + | 414 | hypothetical protein |
| fig|6666666.691807.peg.56 | CDS | VC-2 | 44083 | 46005 | 1 | + | 1923 | Phage replication protein GpA, endonuclease |
| fig|6666666.691807.peg.57 | CDS | VC-2 | 46027 | 46254 | 1 | + | 228 | hypothetical protein |
| fig|6666666.691807.peg.58 | CDS | VC-2 | 46287 | 46490 | 3 | + | 204 | hypothetical protein |
| fig|6666666.691807.peg.59 | CDS | VC-2 | 46494 | 47180 | 3 | + | 687 | C-5 cytosine-specific DNA methylase family protein |
| fig|6666666.691807.peg.60 | CDS | VC-2 | 47177 | 47419 | 2 | + | 243 | hypothetical protein |
| fig|6666666.691807.peg.61 | CDS | VC-2 | 47424 | 47888 | 3 | + | 465 | hypothetical protein |
| fig|6666666.691807.peg.62 | CDS | VC-2 | 47885 | 48109 | 2 | + | 225 | hypothetical protein |
| fig|6666666.691807.peg.63 | CDS | VC-2 | 49221 | 48124 | -3 | - | 1098 | Phage integrase |
| fig|6666666.691807.peg.64 | CDS | VC-2 | 50900 | 52090 | 2 | + | 1191 | hypothetical protein |
| fig|6666666.691807.peg.65 | CDS | VC-2 | 52437 | 53918 | 3 | + | 1482 | Tyrosinase (EC 1.14.18.1) |
| fig|6666666.691807.peg.66 | CDS | VC-2 | 53928 | 54686 | 3 | + | 759 | Putative transmembrane protein |
| fig|6666666.691807.peg.67 | CDS | VC-2 | 55104 | 54706 | -3 | - | 399 | Transcriptional regulator |
| fig|6666666.691807.peg.68 | CDS | VC-2 | 55381 | 56040 | 1 | + | 660 | hypothetical protein |
| fig|6666666.691807.peg.69 | CDS | VC-2 | 57390 | 56053 | -3 | - | 1338 | Methyl-accepting chemotaxis sensor/transducer protein |
| fig|6666666.691807.peg.70 | CDS | VC-2 | 57424 | 57627 | 1 | + | 204 | hypothetical protein |
| fig|6666666.691807.peg.71 | CDS | VC-2 | 57694 | 58542 | 1 | + | 849 | hypothetical protein |
| fig|6666666.691807.peg.72 | CDS | VC-2 | 58628 | 59275 | 2 | + | 648 | Probable glutathione S-transferase (EC 2.5.1.18), YfcF homolog |
| fig|6666666.691807.peg.73 | CDS | VC-2 | 59299 | 59523 | 1 | + | 225 | hypothetical protein |
| fig|6666666.691807.peg.74 | CDS | VC-2 | 60090 | 59557 | -3 | - | 534 | hypothetical protein |
| fig|6666666.691807.peg.75 | CDS | VC-2 | 60533 | 62140 | 2 | + | 1608 | Methyl-accepting chemotaxis sensor/transducer protein |
| fig|6666666.691807.peg.76 | CDS | VC-2 | 63275 | 62244 | -2 | - | 1032 | Probable diguanylate cyclase YeaP |
| fig|6666666.691807.peg.77 | CDS | VC-2 | 64895 | 63444 | -2 | - | 1452 | Two-component system sensor histidine kinase |
| fig|6666666.691807.peg.78 | CDS | VC-2 | 65566 | 64892 | -1 | - | 675 | Two-component transcriptional response regulator, LuxR family |
| fig|6666666.691807.peg.79 | CDS | VC-2 | 66168 | 65764 | -3 | - | 405 | hypothetical protein |
| fig|6666666.691807.peg.80 | CDS | VC-2 | 67721 | 66204 | -2 | - | 1518 | Domain of unknown function / ABC transporter, ATP-binding protein |
| fig|6666666.691807.peg.81 | CDS | VC-2 | 69562 | 68009 | -1 | - | 1554 | Serine protease |
| fig|6666666.691807.peg.82 | CDS | VC-2 | 70026 | 69658 | -3 | - | 369 | Uncharacterized protein YfgD, not an arsenate reductase |
| fig|6666666.691807.peg.83 | CDS | VC-2 | 71374 | 70058 | -1 | - | 1317 | Xanthine permease |
| fig|6666666.691807.peg.84 | CDS | VC-2 | 72965 | 71580 | -2 | - | 1386 | Guanine deaminase (EC 3.5.4.3); Hydroxydechloroatrazine ethylaminohydrolase (EC 3.5.99.3) |
| fig|6666666.691807.peg.85 | CDS | VC-2 | 73986 | 73078 | -3 | - | 909 | Transcriptional regulator, LysR family |
| fig|6666666.691807.peg.86 | CDS | VC-2 | 75690 | 74044 | -3 | - | 1647 | Ferric iron ABC transporter, permease protein |
| fig|6666666.691807.peg.87 | CDS | VC-2 | 75840 | 77000 | 3 | + | 1161 | Ferric iron ABC transporter, ATP-binding protein |
| fig|6666666.691807.peg.88 | CDS | VC-2 | 77098 | 78519 | 1 | + | 1422 | FIG017431: Sigma factor-like phosphatase with CBS pair domains |
| fig|6666666.691807.peg.89 | CDS | VC-2 | 78516 | 79148 | 3 | + | 633 | FIG062788: hypothetical protein |
| fig|6666666.691807.peg.90 | CDS | VC-2 | 79184 | 79570 | 2 | + | 387 | hypothetical protein |
| fig|6666666.691807.peg.91 | CDS | VC-2 | 80072 | 79596 | -2 | - | 477 | Acetyltransferase, GNAT family |
| fig|6666666.691807.peg.92 | CDS | VC-2 | 80836 | 80087 | -1 | - | 750 | Acyl-CoA:1-acyl-sn-glycerol-3-phosphate acyltransferase (EC 2.3.1.51) |
| fig|6666666.691807.peg.93 | CDS | VC-2 | 82134 | 80839 | -3 | - | 1296 | Dihydroorotase (EC 3.5.2.3) |
| fig|6666666.691807.peg.94 | CDS | VC-2 | 83341 | 82379 | -1 | - | 963 | Aspartate carbamoyltransferase (EC 2.1.3.2) |
| fig|6666666.691807.peg.95 | CDS | VC-2 | 83862 | 83344 | -3 | - | 519 | Pyrimidine operon regulatory protein PyrR |
| fig|6666666.691807.peg.96 | CDS | VC-2 | 84317 | 83859 | -2 | - | 459 | Putative pre-16S rRNA nuclease YqgF |
| fig|6666666.691807.peg.97 | CDS | VC-2 | 84913 | 84314 | -1 | - | 600 | UPF0301 protein YqgE |
| fig|6666666.691807.peg.98 | CDS | VC-2 | 84938 | 86419 | 2 | + | 1482 | Deoxyribodipyrimidine photolyase (EC 4.1.99.3) |
| fig|6666666.691807.peg.99 | CDS | VC-2 | 92886 | 86509 | -3 | - | 6378 | Response regulator receiver:CheW-like protein:ATP-binding region, ATPase-like:Hpt |
| fig|6666666.691807.peg.100 | CDS | VC-2 | 95189 | 92937 | -2 | - | 2253 | twitching motility protein PilJ |
| fig|6666666.691807.peg.101 | CDS | VC-2 | 95735 | 95208 | -2 | - | 528 | type IV pili signal transduction protein PilI |
| fig|6666666.691807.peg.102 | CDS | VC-2 | 96116 | 95751 | -2 | - | 366 | twitching motility protein PilH |
| fig|6666666.691807.peg.103 | CDS | VC-2 | 96514 | 96116 | -1 | - | 399 | twitching motility protein PilG |
| fig|6666666.691807.peg.104 | CDS | VC-2 | 96714 | 96562 | -3 | - | 153 | Rubredoxin |
| fig|6666666.691807.peg.105 | CDS | VC-2 | 96830 | 97789 | 2 | + | 960 | Hydroxymethylpyrimidine phosphate kinase ThiD (EC 2.7.4.7) |
| fig|6666666.691807.peg.106 | CDS | VC-2 | 97882 | 99180 | 1 | + | 1299 | Glutamate-1-semialdehyde 2,1-aminomutase (EC 5.4.3.8) |
| fig|6666666.691807.peg.107 | CDS | VC-2 | 99830 | 99231 | -2 | - | 600 | DNA-3-methyladenine glycosylase (EC 3.2.2.20) |
| fig|6666666.691807.peg.108 | CDS | VC-2 | 100309 | 99833 | -1 | - | 477 | Cytochrome c family protein |
| fig|6666666.691807.peg.109 | CDS | VC-2 | 101907 | 100309 | -3 | - | 1599 | IMP cyclohydrolase (EC 3.5.4.10) / Phosphoribosylaminoimidazolecarboxamide formyltransferase (EC 2.1.2.3) |
| fig|6666666.691807.peg.110 | CDS | VC-2 | 102185 | 101952 | -2 | - | 234 | DNA-binding protein Fis |
| fig|6666666.691807.peg.111 | CDS | VC-2 | 103252 | 102182 | -1 | - | 1071 | tRNA-dihydrouridine synthase DusB |
| fig|6666666.691807.peg.112 | CDS | VC-2 | 104004 | 103396 | -3 | - | 609 | hypothetical protein |
| fig|6666666.691807.peg.113 | CDS | VC-2 | 104112 | 104633 | 3 | + | 522 | probable membrane protein YPO3302 |
| fig|6666666.691807.peg.114 | CDS | VC-2 | 105595 | 104672 | -1 | - | 924 | Transcriptional regulator, LysR family |
| fig|6666666.691807.peg.115 | CDS | VC-2 | 105698 | 106402 | 2 | + | 705 | Pirin |
| fig|6666666.691807.peg.116 | CDS | VC-2 | 106511 | 107209 | 2 | + | 699 | Isochorismatase family |
| fig|6666666.691807.peg.117 | CDS | VC-2 | 107646 | 109544 | 3 | + | 1899 | Exoenzymes regulatory protein AepA precursor |
| fig|6666666.691807.peg.118 | CDS | VC-2 | 109556 | 110011 | 2 | + | 456 | Predicted membrane protein |
| fig|6666666.691807.peg.119 | CDS | VC-2 | 110001 | 111671 | 3 | + | 1671 | Uncharacterized MFS-type transporter |
| fig|6666666.691807.peg.120 | CDS | VC-2 | 112360 | 111722 | -1 | - | 639 | Two-component transcriptional response regulator, LuxR family |
| fig|6666666.691807.peg.121 | CDS | VC-2 | 113501 | 112353 | -2 | - | 1149 | Two-component system sensor histidine kinase |
| fig|6666666.691807.peg.122 | CDS | VC-2 | 114976 | 113657 | -1 | - | 1320 | CzcABC family efflux RND transporter, outer membrane protein |
| fig|6666666.691807.peg.123 | CDS | VC-2 | 118161 | 114988 | -3 | - | 3174 | CzcABC family efflux RND transporter, transmembrane protein |
| fig|6666666.691807.peg.124 | CDS | VC-2 | 119294 | 118158 | -2 | - | 1137 | CzcABC family efflux RND transporter, membrane fusion protein |
| fig|6666666.691807.peg.125 | CDS | VC-2 | 120835 | 119837 | -1 | - | 999 | BUG/TctC family periplasmic protein |
| fig|6666666.691807.peg.126 | CDS | VC-2 | 121888 | 120914 | -1 | - | 975 | BUG/TctC family periplasmic protein |
| fig|6666666.691807.peg.127 | CDS | VC-2 | 122869 | 121931 | -1 | - | 939 | 2-dehydropantoate 2-reductase (EC 1.1.1.169) |
| fig|6666666.691807.peg.128 | CDS | VC-2 | 124544 | 122898 | -2 | - | 1647 | Benzoylformate decarboxylase (EC 4.1.1.7) |
| fig|6666666.691807.peg.129 | CDS | VC-2 | 124675 | 125604 | 1 | + | 930 | Transcriptional regulator, LysR family |
| fig|6666666.691807.peg.130 | CDS | VC-2 | 126051 | 126833 | 3 | + | 783 | Oxidoreductase, short-chain dehydrogenase/reductase family |
| fig|6666666.691807.peg.131 | CDS | VC-2 | 127856 | 126861 | -2 | - | 996 | hypothetical protein |
| fig|6666666.691807.peg.132 | CDS | VC-2 | 128748 | 127867 | -3 | - | 882 | Quinolinate phosphoribosyltransferase [decarboxylating] (EC 2.4.2.19) |
| fig|6666666.691807.peg.133 | CDS | VC-2 | 129823 | 128873 | -1 | - | 951 | Predicted NAD regulator in Alphaproteobacteria |
| fig|6666666.691807.peg.134 | CDS | VC-2 | 131170 | 130022 | -1 | - | 1149 | hypothetical protein |
| fig|6666666.691807.peg.135 | CDS | VC-2 | 131313 | 131167 | -3 | - | 147 | hypothetical protein |
| fig|6666666.691807.peg.136 | CDS | VC-2 | 132488 | 131601 | -2 | - | 888 | hypothetical protein |
| fig|6666666.691807.peg.137 | CDS | VC-2 | 133027 | 132485 | -1 | - | 543 | Colicin E2 tolerance protein CbrC-like protein |
| fig|6666666.691807.peg.138 | CDS | VC-2 | 134279 | 133185 | -2 | - | 1095 | GTP-binding and nucleic acid-binding protein YchF |
| fig|6666666.691807.peg.139 | CDS | VC-2 | 135215 | 134349 | -2 | - | 867 | probable iron-sulfur binding protein YPO1417 |
| fig|6666666.691807.peg.140 | CDS | VC-2 | 135321 | 135208 | -3 | - | 114 | hypothetical protein |
| fig|6666666.691807.peg.141 | CDS | VC-2 | 135382 | 136536 | 1 | + | 1155 | 2-polyprenyl-3-methyl-6-methoxy-1,4-benzoquinol hydroxylase |
| fig|6666666.691807.peg.142 | CDS | VC-2 | 136681 | 137397 | 1 | + | 717 | Thiol:disulfide interchange protein DsbC |
| fig|6666666.691807.peg.143 | CDS | VC-2 | 137519 | 139441 | 2 | + | 1923 | Putative protease |
| fig|6666666.691807.peg.144 | CDS | VC-2 | 139537 | 140316 | 1 | + | 780 | Probable enoyl-CoA hydratase paaF (EC 4.2.1.17) |
| fig|6666666.691807.peg.145 | CDS | VC-2 | 140708 | 141745 | 2 | + | 1038 | hypothetical protein |
| fig|6666666.691807.peg.146 | CDS | VC-2 | 141855 | 142604 | 3 | + | 750 | hypothetical protein |
| fig|6666666.691807.peg.147 | CDS | VC-2 | 143833 | 142622 | -1 | - | 1212 | hypothetical protein |
| fig|6666666.691807.peg.148 | CDS | VC-2 | 144902 | 143817 | -2 | - | 1086 | Iron-regulated protein A precursor |
| fig|6666666.691807.peg.149 | CDS | VC-2 | 146398 | 144902 | -1 | - | 1497 | Probable thiol oxidoreductase with 2 cytochrome c heme-binding sites |
| fig|6666666.691807.peg.150 | CDS | VC-2 | 147699 | 146503 | -3 | - | 1197 | Iron-regulated protein A precursor |
| fig|6666666.691807.peg.151 | CDS | VC-2 | 150249 | 147949 | -3 | - | 2301 | TonB-dependent siderophore receptor |
| fig|6666666.691807.peg.152 | CDS | VC-2 | 150720 | 152012 | 3 | + | 1293 | Uncharacterized MFS-type transporter |
| fig|6666666.691807.peg.153 | CDS | VC-2 | 152504 | 152094 | -2 | - | 411 | hypothetical protein |
| fig|6666666.691807.peg.154 | CDS | VC-2 | 152876 | 152598 | -2 | - | 279 | hypothetical protein |
| fig|6666666.691807.peg.155 | CDS | VC-2 | 153917 | 153093 | -2 | - | 825 | DNA-binding domain of ModE / Molybdate-binding domain of ModE |
| fig|6666666.691807.peg.156 | CDS | VC-2 | 153907 | 154785 | 1 | + | 879 | Molybdenum ABC transporter, substrate-binding protein ModA |
| fig|6666666.691807.peg.157 | CDS | VC-2 | 154876 | 155556 | 1 | + | 681 | Molybdenum ABC transporter permease protein ModB |
| fig|6666666.691807.peg.158 | CDS | VC-2 | 155553 | 156683 | 3 | + | 1131 | Molybdenum ABC transporter ATP-binding protein ModC |
| fig|6666666.691807.peg.159 | CDS | VC-2 | 156736 | 157656 | 1 | + | 921 | Sulfur carrier protein FdhD |
| fig|6666666.691807.peg.160 | CDS | VC-2 | 157721 | 158131 | 2 | + | 411 | COG0012: Predicted GTPase, probable translation |
| fig|6666666.691807.peg.161 | CDS | VC-2 | 158288 | 159616 | 2 | + | 1329 | tRNA-i(6)A37 methylthiotransferase (EC 2.8.4.3) |
| fig|6666666.691807.peg.162 | CDS | VC-2 | 159827 | 162115 | 2 | + | 2289 | hypothetical protein |
| fig|6666666.691807.peg.163 | CDS | VC-2 | 162109 | 163329 | 1 | + | 1221 | Uncharacterized protein STM2133 |
| fig|6666666.691807.peg.164 | CDS | VC-2 | 163326 | 164000 | 3 | + | 675 | Putative inner membrane protein |
| fig|6666666.691807.peg.165 | CDS | VC-2 | 164418 | 164023 | -3 | - | 396 | hypothetical protein |
| fig|6666666.691807.peg.166 | CDS | VC-2 | 165071 | 164517 | -2 | - | 555 | Lipoprotein |
| fig|6666666.691807.peg.167 | CDS | VC-2 | 166559 | 165165 | -2 | - | 1395 | Signal recognition particle protein Ffh |
| fig|6666666.691807.peg.168 | CDS | VC-2 | 166596 | 166754 | 3 | + | 159 | hypothetical protein |
| fig|6666666.691807.peg.169 | CDS | VC-2 | 166827 | 170735 | 3 | + | 3909 | Probable sensor/response regulator hybrid protein (EC 2.7.3.-) |
| fig|6666666.691807.peg.170 | CDS | VC-2 | 170728 | 171654 | 1 | + | 927 | Two-component system response regulator protein |
| fig|6666666.691807.peg.171 | CDS | VC-2 | 171660 | 172556 | 3 | + | 897 | Inner membrane protein YpjD |
| fig|6666666.691807.peg.172 | CDS | VC-2 | 172553 | 172813 | 2 | + | 261 | hypothetical protein |
| fig|6666666.691807.peg.173 | CDS | VC-2 | 172816 | 174579 | 1 | + | 1764 | Multi-sensor signal transduction histidine kinase |
| fig|6666666.691807.peg.174 | CDS | VC-2 | 174579 | 176093 | 3 | + | 1515 | Two-component transcriptional response regulator, AtoC family |
| fig|6666666.691807.peg.175 | CDS | VC-2 | 176119 | 176721 | 1 | + | 603 | 1,6-anhydro-N-acetylmuramyl-L-alanine amidase |
| fig|6666666.691807.peg.176 | CDS | VC-2 | 177234 | 177082 | -3 | - | 153 | hypothetical protein |
| fig|6666666.691807.peg.177 | CDS | VC-2 | 177250 | 180168 | 1 | + | 2919 | Ribonucleotide reductase of class Ia (aerobic), alpha subunit (EC 1.17.4.1) |
| fig|6666666.691807.peg.178 | CDS | VC-2 | 180375 | 181469 | 3 | + | 1095 | Ribonucleotide reductase of class Ia (aerobic), beta subunit (EC 1.17.4.1) |
| fig|6666666.691807.peg.179 | CDS | VC-2 | 181647 | 182606 | 3 | + | 960 | Low-complexity acidic protein, XCC2875 type |
| fig|6666666.691807.peg.180 | CDS | VC-2 | 183606 | 182704 | -3 | - | 903 | putative carbohydrate kinase |
| fig|6666666.691807.peg.181 | CDS | VC-2 | 184993 | 183641 | -1 | - | 1353 | Putative transmembrane protein |
| fig|6666666.691807.peg.182 | CDS | VC-2 | 185959 | 185069 | -1 | - | 891 | Ribosomal protein L11 methyltransferase |
| fig|6666666.691807.peg.183 | CDS | VC-2 | 187409 | 186045 | -2 | - | 1365 | Biotin carboxylase of acetyl-CoA carboxylase (EC 6.3.4.14) |
| fig|6666666.691807.peg.184 | CDS | VC-2 | 188006 | 187542 | -2 | - | 465 | Biotin carboxyl carrier protein of acetyl-CoA carboxylase |
| fig|6666666.691807.peg.185 | CDS | VC-2 | 188652 | 188152 | -3 | - | 501 | Cytochrome c-type biogenesis protein ResA |
| fig|6666666.691807.peg.186 | CDS | VC-2 | 189307 | 188699 | -1 | - | 609 | Predicted nucleotidyltransferase |
| fig|6666666.691807.peg.187 | CDS | VC-2 | 189563 | 189330 | -2 | - | 234 | hypothetical protein |
| fig|6666666.691807.peg.188 | CDS | VC-2 | 189552 | 190991 | 3 | + | 1440 | UDP-N-acetylmuramate:L-alanyl-gamma-D-glutamyl-meso-diaminopimelate ligase (EC 6.3.2.-) |
| fig|6666666.691807.peg.189 | CDS | VC-2 | 191392 | 191075 | -1 | - | 318 | hypothetical protein |
| fig|6666666.691807.peg.190 | CDS | VC-2 | 191640 | 192008 | 3 | + | 369 | Uncharacterized protein YqcC |
| fig|6666666.691807.peg.191 | CDS | VC-2 | 193223 | 192066 | -2 | - | 1158 | 2-keto-3-deoxy-D-arabino-heptulosonate-7-phosphate synthase I alpha (EC 2.5.1.54) |
| fig|6666666.691807.peg.192 | CDS | VC-2 | 194285 | 193665 | -2 | - | 621 | hypothetical protein |
| fig|6666666.691807.peg.193 | CDS | VC-2 | 195843 | 194383 | -3 | - | 1461 | TldD protein, part of TldE/TldD proteolytic complex |
| fig|6666666.691807.peg.194 | CDS | VC-2 | 197365 | 196196 | -1 | - | 1170 | Rod shape-determining protein RodA |
| fig|6666666.691807.peg.195 | CDS | VC-2 | 197578 | 198162 | 1 | + | 585 | Esterase YqiA |
| fig|6666666.691807.peg.196 | CDS | VC-2 | 198218 | 200284 | 2 | + | 2067 | Exoribonuclease II (EC 3.1.13.1) |
| fig|6666666.691807.peg.197 | CDS | VC-2 | 200333 | 201196 | 2 | + | 864 | TonB protein |
| fig|6666666.691807.peg.198 | CDS | VC-2 | 201235 | 202092 | 1 | + | 858 | Shikimate 5-dehydrogenase I alpha (EC 1.1.1.25) |
| fig|6666666.691807.peg.199 | CDS | VC-2 | 202100 | 202816 | 2 | + | 717 | Monofunctional biosynthetic peptidoglycan transglycosylase |
| fig|6666666.691807.peg.200 | CDS | VC-2 | 202834 | 203382 | 1 | + | 549 | Crossover junction endodeoxyribonuclease RuvC (EC 3.1.22.4) |
| fig|6666666.691807.peg.201 | CDS | VC-2 | 203792 | 203376 | -2 | - | 417 | Esterase/lipase/thioesterase family protein |
| Contig VC-16 | | | | | | | | |
| Feature ID | Type | Contig | start | stop | Frame | Strand | Length(bp) | Function |
| fig|6666666.692453.peg.1 | CDS | VC-16 | 446 | 324 | -2 | - | 123 | hypothetical protein |
| fig|6666666.692453.peg.2 | CDS | VC-16 | 1178 | 447 | -2 | - | 732 | Autolysis response regulater LytR |
| fig|6666666.692453.peg.3 | CDS | VC-16 | 2232 | 1189 | -3 | - | 1044 | Autolysin sensor kinase (EC 2.7.3.-) |
| fig|6666666.692453.peg.4 | CDS | VC-16 | 2895 | 2236 | -3 | - | 660 | phospholipase/carboxylesterase family protein |
| fig|6666666.692453.peg.5 | CDS | VC-16 | 4871 | 2946 | -2 | - | 1926 | Glucans biosynthesis glucosyltransferase H (EC 2.4.1.-) |
| fig|6666666.692453.peg.6 | CDS | VC-16 | 5362 | 7407 | 1 | + | 2046 | Colicin I receptor precursor |
| fig|6666666.692453.peg.7 | CDS | VC-16 | 7638 | 7468 | -3 | - | 171 | hypothetical protein |
| fig|6666666.692453.peg.8 | CDS | VC-16 | 7852 | 8238 | 1 | + | 387 | FIG01112898: hypothetical protein |
| fig|6666666.692453.peg.9 | CDS | VC-16 | 10848 | 8317 | -3 | - | 2532 | Methyl-accepting chemotaxis protein I (serine chemoreceptor protein) |
| fig|6666666.692453.peg.10 | CDS | VC-16 | 11952 | 11059 | -3 | - | 894 | UDP-glucose 4-epimerase (EC 5.1.3.2) |
| fig|6666666.692453.peg.11 | CDS | VC-16 | 13004 | 12051 | -2 | - | 954 | peptidase S41 |
| fig|6666666.692453.peg.12 | CDS | VC-16 | 12979 | 13476 | 1 | + | 498 | transcriptional regulator marR family |
| fig|6666666.692453.peg.13 | CDS | VC-16 | 14966 | 13482 | -2 | - | 1485 | hypothetical protein |
| fig|6666666.692453.peg.14 | CDS | VC-16 | 15125 | 14970 | -2 | - | 156 | hypothetical protein |
| fig|6666666.692453.peg.15 | CDS | VC-16 | 15211 | 15525 | 1 | + | 315 | Pyridoxamine 5&#39;-phosphate oxidase (EC 1.4.3.5) |
| fig|6666666.692453.peg.16 | CDS | VC-16 | 17008 | 15536 | -1 | - | 1473 | Permeases of the major facilitator superfamily |
| fig|6666666.692453.peg.17 | CDS | VC-16 | 17198 | 17755 | 2 | + | 558 | Transcriptional regulator, TetR family |
| fig|6666666.692453.peg.18 | CDS | VC-16 | 18121 | 17771 | -1 | - | 351 | Lactoylglutathione lyase (EC 4.4.1.5) |
| fig|6666666.692453.peg.19 | CDS | VC-16 | 18444 | 18244 | -3 | - | 201 | FIG01111417: hypothetical protein |
| fig|6666666.692453.peg.20 | CDS | VC-16 | 18633 | 22019 | 3 | + | 3387 | FIG01111736: hypothetical protein |
| fig|6666666.692453.peg.21 | CDS | VC-16 | 23276 | 22074 | -2 | - | 1203 | Bicyclomycin resistance protein |
| fig|6666666.692453.peg.22 | CDS | VC-16 | 23982 | 23530 | -3 | - | 453 | FIG01210133: hypothetical protein |
| fig|6666666.692453.peg.23 | CDS | VC-16 | 24448 | 25089 | 1 | + | 642 | Glutathione S-transferase (EC 2.5.1.18) |
| fig|6666666.692453.peg.24 | CDS | VC-16 | 25521 | 25114 | -3 | - | 408 | FIG01112641: hypothetical protein |
| fig|6666666.692453.peg.25 | CDS | VC-16 | 25990 | 25571 | -1 | - | 420 | HigA protein (antitoxin to HigB) |
| fig|6666666.692453.peg.26 | CDS | VC-16 | 26109 | 26501 | 3 | + | 393 | Inner membrane protein YqjF |
| fig|6666666.692453.peg.27 | CDS | VC-16 | 28295 | 26520 | -2 | - | 1776 | Beta-lactamase (EC 3.5.2.6) |
| fig|6666666.692453.peg.28 | CDS | VC-16 | 28943 | 29506 | 2 | + | 564 | putative; ORF located using Glimmer/Genemark |
| fig|6666666.692453.peg.29 | CDS | VC-16 | 29503 | 30018 | 1 | + | 516 | putative; ORF located using Glimmer/Genemark |
| fig|6666666.692453.peg.30 | CDS | VC-16 | 30311 | 31672 | 2 | + | 1362 | Integrase |
| fig|6666666.692453.peg.31 | CDS | VC-16 | 32286 | 31693 | -3 | - | 594 | Transcriptional regulator, XRE family |
| fig|6666666.692453.peg.32 | CDS | VC-16 | 32560 | 32706 | 1 | + | 147 | hypothetical protein |
| fig|6666666.692453.peg.33 | CDS | VC-16 | 33115 | 32726 | -1 | - | 390 | hypothetical protein |
| fig|6666666.692453.peg.34 | CDS | VC-16 | 33528 | 33755 | 3 | + | 228 | hypothetical protein |
| fig|6666666.692453.peg.35 | CDS | VC-16 | 33955 | 34437 | 1 | + | 483 | Error-prone repair protein UmuD |
| fig|6666666.692453.peg.36 | CDS | VC-16 | 34421 | 35671 | 2 | + | 1251 | Error-prone, lesion bypass DNA polymerase V (UmuC) |
| fig|6666666.692453.peg.37 | CDS | VC-16 | 36398 | 35718 | -2 | - | 681 | hypothetical protein |
| fig|6666666.692453.peg.38 | CDS | VC-16 | 37287 | 36379 | -3 | - | 909 | Rossmann fold nucleotide-binding protein Smf possibly involved in DNA uptake |
| fig|6666666.692453.peg.39 | CDS | VC-16 | 38583 | 37621 | -3 | - | 963 | hypothetical protein |
| fig|6666666.692453.peg.40 | CDS | VC-16 | 39288 | 38602 | -3 | - | 687 | hypothetical protein |
| fig|6666666.692453.peg.41 | CDS | VC-16 | 39589 | 39290 | -1 | - | 300 | hypothetical protein |
| fig|6666666.692453.peg.42 | CDS | VC-16 | 46657 | 39644 | -1 | - | 7014 | Phage tail fiber protein |
| fig|6666666.692453.peg.43 | CDS | VC-16 | 47043 | 46648 | -3 | - | 396 | Phage peptidoglycan hydrolase (lysin) |
| fig|6666666.692453.peg.44 | CDS | VC-16 | 47504 | 47043 | -2 | - | 462 | Phage protein |
| fig|6666666.692453.peg.45 | CDS | VC-16 | 47623 | 47820 | 1 | + | 198 | hypothetical protein |
| fig|6666666.692453.peg.46 | CDS | VC-16 | 47979 | 47803 | -3 | - | 177 | hypothetical protein |
| fig|6666666.692453.peg.47 | CDS | VC-16 | 48420 | 48064 | -3 | - | 357 | Phage protein |
| fig|6666666.692453.peg.48 | CDS | VC-16 | 51194 | 48420 | -2 | - | 2775 | Phage tail length tape-measure protein 1 |
| fig|6666666.692453.peg.49 | CDS | VC-16 | 51830 | 51411 | -2 | - | 420 | hypothetical protein |
| fig|6666666.692453.peg.50 | CDS | VC-16 | 52588 | 51833 | -1 | - | 756 | hypothetical protein |
| fig|6666666.692453.peg.51 | CDS | VC-16 | 53080 | 52625 | -1 | - | 456 | hypothetical protein |
| fig|6666666.692453.peg.52 | CDS | VC-16 | 53387 | 53073 | -2 | - | 315 | hypothetical protein |
| fig|6666666.692453.peg.53 | CDS | VC-16 | 54160 | 53402 | -1 | - | 759 | FIG01217905: hypothetical protein |
| fig|6666666.692453.peg.54 | CDS | VC-16 | 55207 | 54206 | -1 | - | 1002 | elements of external origin; phage-related functions and prophages |
| fig|6666666.692453.peg.55 | CDS | VC-16 | 55984 | 55295 | -1 | - | 690 | hypothetical protein |
| fig|6666666.692453.peg.56 | CDS | VC-16 | 57348 | 55987 | -3 | - | 1362 | Head-tail preconnector protein GP5 |
| fig|6666666.692453.peg.57 | CDS | VC-16 | 58819 | 57338 | -1 | - | 1482 | Phage portal protein |
| fig|6666666.692453.peg.58 | CDS | VC-16 | 59027 | 58812 | -2 | - | 216 | hypothetical protein |
| fig|6666666.692453.peg.59 | CDS | VC-16 | 61023 | 59029 | -3 | - | 1995 | Terminase large subunit |
| fig|6666666.692453.peg.60 | CDS | VC-16 | 61594 | 61091 | -1 | - | 504 | Phage protein |
| fig|6666666.692453.peg.61 | CDS | VC-16 | 62075 | 61788 | -2 | - | 288 | hypothetical protein |
| fig|6666666.692453.peg.62 | CDS | VC-16 | 62559 | 62077 | -3 | - | 483 | hypothetical protein |
| fig|6666666.692453.peg.63 | CDS | VC-16 | 62999 | 62556 | -2 | - | 444 | hypothetical protein |
| fig|6666666.692453.peg.64 | CDS | VC-16 | 63496 | 63008 | -1 | - | 489 | Phage lysin |
| fig|6666666.692453.peg.65 | CDS | VC-16 | 64319 | 64984 | 2 | + | 666 | hypothetical protein |
| fig|6666666.692453.peg.66 | CDS | VC-16 | 65861 | 65094 | -2 | - | 768 | hypothetical protein |
| fig|6666666.692453.peg.67 | CDS | VC-16 | 66013 | 65861 | -1 | - | 153 | hypothetical protein |
| fig|6666666.692453.peg.68 | CDS | VC-16 | 67761 | 66010 | -3 | - | 1752 | Probable helicase |
| fig|6666666.692453.peg.69 | CDS | VC-16 | 68189 | 67758 | -2 | - | 432 | hypothetical protein |
| fig|6666666.692453.peg.70 | CDS | VC-16 | 68545 | 68189 | -1 | - | 357 | hypothetical protein |
| fig|6666666.692453.peg.71 | CDS | VC-16 | 69336 | 68545 | -3 | - | 792 | Phage-related protein |
| fig|6666666.692453.peg.72 | CDS | VC-16 | 69845 | 69333 | -2 | - | 513 | Helicase subunit of the DNA excision repair complex |
| fig|6666666.692453.peg.73 | CDS | VC-16 | 70375 | 69845 | -1 | - | 531 | hypothetical protein |
| fig|6666666.692453.peg.74 | CDS | VC-16 | 70916 | 70362 | -2 | - | 555 | hypothetical protein |
| fig|6666666.692453.peg.75 | CDS | VC-16 | 71940 | 70939 | -3 | - | 1002 | hypothetical protein |
| fig|6666666.692453.peg.76 | CDS | VC-16 | 72326 | 71940 | -2 | - | 387 | hypothetical protein |
| fig|6666666.692453.peg.77 | CDS | VC-16 | 72634 | 72323 | -1 | - | 312 | hypothetical protein |
| fig|6666666.692453.peg.78 | CDS | VC-16 | 73248 | 72646 | -3 | - | 603 | hypothetical protein |
| fig|6666666.692453.peg.79 | CDS | VC-16 | 73629 | 73357 | -3 | - | 273 | hypothetical protein |
| fig|6666666.692453.peg.80 | CDS | VC-16 | 74133 | 74537 | 3 | + | 405 | Phage protein |
| fig|6666666.692453.peg.81 | CDS | VC-16 | 74550 | 74960 | 3 | + | 411 | hypothetical protein |
| fig|6666666.692453.peg.82 | CDS | VC-16 | 75626 | 75168 | -2 | - | 459 | hypothetical protein |
| fig|6666666.692453.peg.83 | CDS | VC-16 | 75715 | 76230 | 1 | + | 516 | hypothetical protein |
| fig|6666666.692453.peg.84 | CDS | VC-16 | 76227 | 76511 | 3 | + | 285 | hypothetical protein |
| fig|6666666.692453.peg.85 | CDS | VC-16 | 76508 | 76732 | 2 | + | 225 | hypothetical protein |
| fig|6666666.692453.peg.86 | CDS | VC-16 | 76729 | 77001 | 1 | + | 273 | hypothetical protein |
| fig|6666666.692453.peg.87 | CDS | VC-16 | 76998 | 77261 | 3 | + | 264 | hypothetical protein |
| fig|6666666.692453.peg.88 | CDS | VC-16 | 77258 | 77452 | 2 | + | 195 | hypothetical protein |
| fig|6666666.692453.peg.89 | CDS | VC-16 | 77452 | 77697 | 1 | + | 246 | hypothetical protein |
| fig|6666666.692453.peg.90 | CDS | VC-16 | 77713 | 77937 | 1 | + | 225 | hypothetical protein |
| fig|6666666.692453.peg.91 | CDS | VC-16 | 77957 | 78163 | 2 | + | 207 | hypothetical protein |
| fig|6666666.692453.peg.92 | CDS | VC-16 | 78174 | 78626 | 3 | + | 453 | hypothetical protein |
| fig|6666666.692453.peg.93 | CDS | VC-16 | 78619 | 79182 | 1 | + | 564 | hypothetical protein |
| fig|6666666.692453.peg.94 | CDS | VC-16 | 79175 | 79423 | 2 | + | 249 | hypothetical protein |
| fig|6666666.692453.peg.95 | CDS | VC-16 | 79416 | 79622 | 3 | + | 207 | hypothetical protein |
| fig|6666666.692453.peg.96 | CDS | VC-16 | 79697 | 79945 | 2 | + | 249 | hypothetical protein |
| fig|6666666.692453.peg.97 | CDS | VC-16 | 79942 | 80514 | 1 | + | 573 | hypothetical protein |
| fig|6666666.692453.peg.98 | CDS | VC-16 | 80511 | 80921 | 3 | + | 411 | hypothetical protein |
| fig|6666666.692453.peg.99 | CDS | VC-16 | 80908 | 81162 | 1 | + | 255 | hypothetical protein |
| fig|6666666.692453.peg.100 | CDS | VC-16 | 82036 | 81368 | -1 | - | 669 | putative; ORF located using Glimmer/Genemark |
| fig|6666666.692453.peg.101 | CDS | VC-16 | 84028 | 82175 | -1 | - | 1854 | RNA polymerase sigma factor RpoD |
| fig|6666666.692453.peg.102 | CDS | VC-16 | 84559 | 84119 | -1 | - | 441 | D-tyrosyl-tRNA(Tyr) deacylase (EC 3.6.1.n1) |
| fig|6666666.692453.peg.103 | CDS | VC-16 | 84621 | 85541 | 3 | + | 921 | Lipid A biosynthesis lauroyl acyltransferase (EC 2.3.1.-) |
| fig|6666666.692453.peg.104 | CDS | VC-16 | 85614 | 86750 | 3 | + | 1137 | 3,4-dihydroxy-2-butanone 4-phosphate synthase (EC 4.1.99.12) / GTP cyclohydrolase II (EC 3.5.4.25) |
| fig|6666666.692453.peg.105 | CDS | VC-16 | 86826 | 87326 | 3 | + | 501 | FIG01112130: hypothetical protein |
| fig|6666666.692453.peg.106 | CDS | VC-16 | 87323 | 88861 | 2 | + | 1539 | Possibly related to ydbT |
| Contig VC-20 | | | | | | | | |
| Feature ID | Type | Contig | Start | Stop | Frame | Strand | Length(bp) | Function |
| fig|6666666.692451.peg.1 | CDS | VC-20 | 294 | 1532 | 3 | + | 1239 | Integrase |
| fig|6666666.692451.peg.2 | CDS | VC-20 | 1698 | 1522 | -3 | - | 177 | hypothetical protein |
| fig|6666666.692451.peg.3 | CDS | VC-20 | 1985 | 1698 | -2 | - | 288 | hypothetical protein |
| fig|6666666.692451.peg.4 | CDS | VC-20 | 2262 | 1987 | -3 | - | 276 | hypothetical protein |
| fig|6666666.692451.peg.5 | CDS | VC-20 | 2792 | 2262 | -2 | - | 531 | Phage protein |
| fig|6666666.692451.peg.6 | CDS | VC-20 | 3011 | 2847 | -2 | - | 165 | hypothetical protein |
| fig|6666666.692451.peg.7 | CDS | VC-20 | 3399 | 3028 | -3 | - | 372 | hypothetical protein |
| fig|6666666.692451.peg.8 | CDS | VC-20 | 3610 | 3416 | -1 | - | 195 | hypothetical protein |
| fig|6666666.692451.peg.9 | CDS | VC-20 | 3828 | 3610 | -3 | - | 219 | hypothetical protein |
| fig|6666666.692451.peg.10 | CDS | VC-20 | 4088 | 3828 | -2 | - | 261 | hypothetical protein |
| fig|6666666.692451.peg.11 | CDS | VC-20 | 4369 | 4097 | -1 | - | 273 | hypothetical protein |
| fig|6666666.692451.peg.12 | CDS | VC-20 | 5251 | 4451 | -1 | - | 801 | Phage protein |
| fig|6666666.692451.peg.13 | CDS | VC-20 | 5635 | 5303 | -1 | - | 333 | Translation elongation factors (GTPases) |
| fig|6666666.692451.peg.14 | CDS | VC-20 | 5914 | 6030 | 1 | + | 117 | hypothetical protein |
| fig|6666666.692451.peg.15 | CDS | VC-20 | 6460 | 5999 | -1 | - | 462 | hypothetical protein |
| fig|6666666.692451.peg.16 | CDS | VC-20 | 7178 | 6486 | -2 | - | 693 | merops peptidase family S24 |
| fig|6666666.692451.peg.17 | CDS | VC-20 | 7306 | 7482 | 1 | + | 177 | FIG00352411: hypothetical protein |
| fig|6666666.692451.peg.18 | CDS | VC-20 | 7491 | 7766 | 3 | + | 276 | hypothetical protein |
| fig|6666666.692451.peg.19 | CDS | VC-20 | 7812 | 8540 | 3 | + | 729 | Putative DNA-binding protein Roi of bacteriophage BP-933W |
| fig|6666666.692451.peg.20 | CDS | VC-20 | 8537 | 9379 | 2 | + | 843 | Replication protein O |
| fig|6666666.692451.peg.21 | CDS | VC-20 | 9370 | 9984 | 1 | + | 615 | hypothetical protein |
| fig|6666666.692451.peg.22 | CDS | VC-20 | 9981 | 10469 | 3 | + | 489 | hypothetical protein |
| fig|6666666.692451.peg.23 | CDS | VC-20 | 10466 | 10798 | 2 | + | 333 | hypothetical protein |
| fig|6666666.692451.peg.24 | CDS | VC-20 | 10803 | 11198 | 3 | + | 396 | FIG00353455: hypothetical protein |
| fig|6666666.692451.peg.25 | CDS | VC-20 | 11195 | 11557 | 2 | + | 363 | hypothetical protein |
| fig|6666666.692451.peg.26 | CDS | VC-20 | 11550 | 11984 | 3 | + | 435 | hypothetical protein |
| fig|6666666.692451.peg.27 | CDS | VC-20 | 11995 | 12408 | 1 | + | 414 | hypothetical protein |
| fig|6666666.692451.peg.28 | CDS | VC-20 | 12955 | 13068 | 1 | + | 114 | hypothetical protein |
| fig|6666666.692451.peg.29 | CDS | VC-20 | 13141 | 13530 | 1 | + | 390 | Phage protein |
| fig|6666666.692451.peg.30 | CDS | VC-20 | 13611 | 13784 | 3 | + | 174 | hypothetical protein |
| fig|6666666.692451.peg.31 | CDS | VC-20 | 13789 | 14007 | 1 | + | 219 | hypothetical protein |
| fig|6666666.692451.peg.32 | CDS | VC-20 | 14037 | 14219 | 3 | + | 183 | hypothetical protein |
| fig|6666666.692451.peg.33 | CDS | VC-20 | 14221 | 14439 | 1 | + | 219 | hypothetical protein |
| fig|6666666.692451.peg.34 | CDS | VC-20 | 14861 | 15352 | 2 | + | 492 | Phage terminase, small subunit |
| fig|6666666.692451.peg.35 | CDS | VC-20 | 15363 | 17078 | 3 | + | 1716 | Phage terminase, large subunit |
| fig|6666666.692451.peg.36 | CDS | VC-20 | 17078 | 18343 | 2 | + | 1266 | Phage portal protein |
| fig|6666666.692451.peg.37 | CDS | VC-20 | 18312 | 19157 | 3 | + | 846 | Prophage Clp protease-like protein |
| fig|6666666.692451.peg.38 | CDS | VC-20 | 19222 | 20430 | 1 | + | 1209 | Phage major capsid protein |
| fig|6666666.692451.peg.39 | CDS | VC-20 | 20480 | 20812 | 2 | + | 333 | TolA protein |
| fig|6666666.692451.peg.40 | CDS | VC-20 | 20822 | 21295 | 2 | + | 474 | hypothetical protein |
| fig|6666666.692451.peg.41 | CDS | VC-20 | 21296 | 21652 | 2 | + | 357 | Phage protein |
| fig|6666666.692451.peg.42 | CDS | VC-20 | 21634 | 22104 | 1 | + | 471 | hypothetical protein |
| fig|6666666.692451.peg.43 | CDS | VC-20 | 22101 | 22475 | 3 | + | 375 | Phage protein |
| fig|6666666.692451.peg.44 | CDS | VC-20 | 22576 | 23088 | 1 | + | 513 | Phage protein |
| fig|6666666.692451.peg.45 | CDS | VC-20 | 23160 | 23630 | 3 | + | 471 | Phage tail fibers |
| fig|6666666.692451.peg.46 | CDS | VC-20 | 23630 | 24067 | 2 | + | 438 | hypothetical protein |
| fig|6666666.692451.peg.47 | CDS | VC-20 | 24160 | 24291 | 1 | + | 132 | hypothetical protein |
| fig|6666666.692451.peg.48 | CDS | VC-20 | 24590 | 24288 | -2 | - | 303 | hypothetical protein |
| fig|6666666.692451.peg.49 | CDS | VC-20 | 24725 | 24904 | 2 | + | 180 | hypothetical protein |
| fig|6666666.692451.peg.50 | CDS | VC-20 | 24982 | 25815 | 1 | + | 834 | Phage Rha protein |
| fig|6666666.692451.peg.51 | CDS | VC-20 | 25896 | 26330 | 3 | + | 435 | hypothetical protein |
| fig|6666666.692451.peg.52 | CDS | VC-20 | 26389 | 28941 | 1 | + | 2553 | Phage tail length tape-measure protein 1 |
| fig|6666666.692451.peg.53 | CDS | VC-20 | 28951 | 29418 | 1 | + | 468 | hypothetical protein |
| fig|6666666.692451.peg.54 | CDS | VC-20 | 29419 | 29925 | 1 | + | 507 | hypothetical protein |
| fig|6666666.692451.peg.55 | CDS | VC-20 | 30138 | 30311 | 3 | + | 174 | hypothetical protein |
| fig|6666666.692451.peg.56 | CDS | VC-20 | 30268 | 33066 | 1 | + | 2799 | FIG00351590: hypothetical protein |
| fig|6666666.692451.peg.57 | CDS | VC-20 | 33121 | 35142 | 1 | + | 2022 | Phage tail fiber protein |
| fig|6666666.692451.peg.58 | CDS | VC-20 | 35144 | 35944 | 2 | + | 801 | hypothetical protein |
| fig|6666666.692451.peg.59 | CDS | VC-20 | 36091 | 36372 | 1 | + | 282 | Holin |
| fig|6666666.692451.peg.60 | CDS | VC-20 | 36369 | 37145 | 3 | + | 777 | N-acetylmuramoyl-L-alanine amidase, putative |
| fig|6666666.692451.peg.61 | CDS | VC-20 | 37142 | 37438 | 2 | + | 297 | hypothetical protein |
| fig|6666666.692451.peg.62 | CDS | VC-20 | 38098 | 37520 | -1 | - | 579 | hypothetical protein |
| fig|6666666.692451.peg.63 | CDS | VC-20 | 38830 | 38708 | -1 | - | 123 | Molybdopterin-guanine dinucleotide biosynthesis protein MobA |
| fig|6666666.692451.peg.64 | CDS | VC-20 | 40169 | 38952 | -2 | - | 1218 | Molybdopterin biosynthesis protein MoeA |
| fig|6666666.692451.peg.65 | CDS | VC-20 | 41089 | 40166 | -1 | - | 924 | Molybdenum cofactor biosynthesis protein MoaC / Molybdenum cofactor biosynthesis protein MoaB |
| fig|6666666.692451.peg.66 | CDS | VC-20 | 42110 | 41229 | -2 | - | 882 | Molybdenum cofactor biosynthesis protein MoaA |
| fig|6666666.692451.peg.67 | CDS | VC-20 | 42620 | 45034 | 2 | + | 2415 | Putative formate dehydrogenase oxidoreductase protein |
| fig|6666666.692451.peg.68 | CDS | VC-20 | 45140 | 45922 | 2 | + | 783 | Formate dehydrogenase chain D (EC 1.2.1.2) |
| fig|6666666.692451.peg.69 | CDS | VC-20 | 45980 | 46357 | 2 | + | 378 | DNA-binding domain of ModE |
| fig|6666666.692451.peg.70 | CDS | VC-20 | 46597 | 47379 | 1 | + | 783 | Molybdenum ABC transporter, periplasmic molybdenum-binding protein ModA (TC 3.A.1.8.1) |
| fig|6666666.692451.peg.71 | CDS | VC-20 | 47382 | 48071 | 3 | + | 690 | Molybdenum transport system permease protein ModB (TC 3.A.1.8.1) |
| fig|6666666.692451.peg.72 | CDS | VC-20 | 48076 | 48693 | 1 | + | 618 | Molybdenum transport ATP-binding protein ModC (TC 3.A.1.8.1) |
| fig|6666666.692451.peg.73 | CDS | VC-20 | 49128 | 48772 | -3 | - | 357 | transcriptional regulator, AraC family protein |
| fig|6666666.692451.peg.74 | CDS | VC-20 | 49826 | 49413 | -2 | - | 414 | FIG027190: Putative transmembrane protein |
| fig|6666666.692451.peg.75 | CDS | VC-20 | 49894 | 50718 | 1 | + | 825 | Transcriptional regulator, AraC family |
| fig|6666666.692451.peg.76 | CDS | VC-20 | 50885 | 51661 | 2 | + | 777 | Ribulose-5-phosphate 4-epimerase and related epimerases and aldolases |
| fig|6666666.692451.peg.77 | CDS | VC-20 | 53106 | 51712 | -3 | - | 1395 | Transcriptional regulator, GntR family domain / Aspartate aminotransferase (EC 2.6.1.1) |
| fig|6666666.692451.peg.78 | CDS | VC-20 | 53234 | 54094 | 2 | + | 861 | Permease of the drug/metabolite transporter (DMT) superfamily |
| fig|6666666.692451.peg.79 | CDS | VC-20 | 54464 | 56347 | 2 | + | 1884 | putative Glutathione-regulated potassium-efflux system protein KefB |
| fig|6666666.692451.peg.80 | CDS | VC-20 | 58044 | 56467 | -3 | - | 1578 | FOG: GGDEF domain |
| fig|6666666.692451.peg.81 | CDS | VC-20 | 58368 | 58547 | 3 | + | 180 | hypothetical protein |
| fig|6666666.692451.peg.82 | CDS | VC-20 | 58924 | 58694 | -1 | - | 231 | hypothetical protein |
| fig|6666666.692451.peg.83 | CDS | VC-20 | 59221 | 59108 | -1 | - | 114 | Serine acetyltransferase (EC 2.3.1.30) |
| fig|6666666.692451.peg.84 | CDS | VC-20 | 60159 | 60377 | 3 | + | 219 | hypothetical protein |
| fig|6666666.692451.peg.85 | CDS | VC-20 | 61281 | 60685 | -3 | - | 597 | FIG00350032: hypothetical protein |
| fig|6666666.692451.peg.86 | CDS | VC-20 | 62069 | 61371 | -2 | - | 699 | Exodeoxyribonuclease X (EC 3.1.11.-) |
| fig|6666666.692451.peg.87 | CDS | VC-20 | 62561 | 63820 | 2 | + | 1260 | Lysophospholipase (EC 3.1.1.5) |
| fig|6666666.692451.peg.88 | CDS | VC-20 | 63977 | 65230 | 2 | + | 1254 | Serine hydroxymethyltransferase (EC 2.1.2.1) |
| fig|6666666.692451.peg.89 | CDS | VC-20 | 65401 | 65805 | 1 | + | 405 | Regulator of nucleoside diphosphate kinase |
| fig|6666666.692451.peg.90 | CDS | VC-20 | 66118 | 66906 | 1 | + | 789 | putative tellurium resistant protein (KlaA/kilA) |
| fig|6666666.692451.peg.91 | CDS | VC-20 | 66926 | 68059 | 2 | + | 1134 | putative tellurique resistant protein (KlaB/TelA) |
| fig|6666666.692451.peg.92 | CDS | VC-20 | 68093 | 68479 | 2 | + | 387 | hypothetical protein; putative membrane protein |
| fig|6666666.692451.peg.93 | CDS | VC-20 | 68485 | 69018 | 1 | + | 534 | hypothetical protein; putative membrane protein |
| fig|6666666.692451.peg.94 | CDS | VC-20 | 69188 | 69835 | 2 | + | 648 | Alkyl hydroperoxide reductase protein F (EC 1.6.4.-) |
| Contig VC-22 | | | | | | | | |
| Feature ID | Type | Contig | Start | Stop | Frame | Strand | Length(bp) | Function |
| fig|6666666.692457.peg.1 | CDS | VC-22 | 746 | 405 | -2 | - | 342 | Phage minor tail protein |
| fig|6666666.692457.peg.2 | CDS | VC-22 | 1203 | 733 | -3 | - | 471 | hypothetical protein |
| fig|6666666.692457.peg.3 | CDS | VC-22 | 1171 | 1299 | 1 | + | 129 | hypothetical protein |
| fig|6666666.692457.peg.4 | CDS | VC-22 | 5179 | 1259 | -1 | - | 3921 | Phage tail length tape-measure protein 1 |
| fig|6666666.692457.peg.5 | CDS | VC-22 | 5645 | 5235 | -2 | - | 411 | hypothetical protein |
| fig|6666666.692457.peg.6 | CDS | VC-22 | 5860 | 5708 | -1 | - | 153 | hypothetical protein |
| fig|6666666.692457.peg.7 | CDS | VC-22 | 6333 | 5875 | -3 | - | 459 | Phage protein |
| fig|6666666.692457.peg.8 | CDS | VC-22 | 6888 | 6379 | -3 | - | 510 | Phage tail fibers |
| fig|6666666.692457.peg.9 | CDS | VC-22 | 7310 | 6942 | -2 | - | 369 | hypothetical protein |
| fig|6666666.692457.peg.10 | CDS | VC-22 | 7754 | 7311 | -2 | - | 444 | Phage protein |
| fig|6666666.692457.peg.11 | CDS | VC-22 | 8095 | 7736 | -1 | - | 360 | hypothetical protein |
| fig|6666666.692457.peg.12 | CDS | VC-22 | 8401 | 8096 | -1 | - | 306 | hypothetical protein |
| fig|6666666.692457.peg.13 | CDS | VC-22 | 9974 | 8472 | -2 | - | 1503 | Phage major capsid protein #Fam0024 |
| fig|6666666.692457.peg.14 | CDS | VC-22 | 10763 | 10038 | -2 | - | 726 | probable phage prohead protease, HK97 family |
| fig|6666666.692457.peg.15 | CDS | VC-22 | 12036 | 10753 | -3 | - | 1284 | Phage portal protein |
| fig|6666666.692457.peg.16 | CDS | VC-22 | 13871 | 12033 | -2 | - | 1839 | Phage terminase, large subunit |
| fig|6666666.692457.peg.17 | CDS | VC-22 | 14394 | 13882 | -3 | - | 513 | Phage Terminase Small Subunit |
| fig|6666666.692457.peg.18 | CDS | VC-22 | 14768 | 14538 | -2 | - | 231 | hypothetical protein |
| fig|6666666.692457.peg.19 | CDS | VC-22 | 15358 | 14771 | -1 | - | 588 | Phage holin |
| fig|6666666.692457.peg.20 | CDS | VC-22 | 16263 | 15802 | -3 | - | 462 | hypothetical protein |
| fig|6666666.692457.peg.21 | CDS | VC-22 | 18365 | 16599 | -2 | - | 1767 | DNA primase (bacterial type) |
| fig|6666666.692457.peg.22 | CDS | VC-22 | 19279 | 18362 | -1 | - | 918 | DNA primase (EC 2.7.7.-) |
| fig|6666666.692457.peg.23 | CDS | VC-22 | 19760 | 19272 | -2 | - | 489 | hypothetical protein |
| fig|6666666.692457.peg.24 | CDS | VC-22 | 20037 | 19807 | -3 | - | 231 | hypothetical protein |
| fig|6666666.692457.peg.25 | CDS | VC-22 | 20276 | 20995 | 2 | + | 720 | hypothetical protein |
| fig|6666666.692457.peg.26 | CDS | VC-22 | 21214 | 21339 | 1 | + | 126 | hypothetical protein |
| fig|6666666.692457.peg.27 | CDS | VC-22 | 21318 | 21533 | 3 | + | 216 | hypothetical protein |
| fig|6666666.692457.peg.28 | CDS | VC-22 | 21530 | 21853 | 2 | + | 324 | hypothetical protein |
| fig|6666666.692457.peg.29 | CDS | VC-22 | 21939 | 22136 | 3 | + | 198 | hypothetical protein |
| fig|6666666.692457.peg.30 | CDS | VC-22 | 22126 | 22587 | 1 | + | 462 | hypothetical protein |
| fig|6666666.692457.peg.31 | CDS | VC-22 | 22584 | 22778 | 3 | + | 195 | hypothetical protein |
| fig|6666666.692457.peg.32 | CDS | VC-22 | 22775 | 23287 | 2 | + | 513 | hypothetical protein |
| fig|6666666.692457.peg.33 | CDS | VC-22 | 23274 | 23507 | 3 | + | 234 | hypothetical protein |
| fig|6666666.692457.peg.34 | CDS | VC-22 | 23504 | 23752 | 2 | + | 249 | hypothetical protein |
| fig|6666666.692457.peg.35 | CDS | VC-22 | 24677 | 23727 | -2 | - | 951 | Integrase |
| fig|6666666.692457.peg.36 | CDS | VC-22 | 25576 | 24860 | -1 | - | 717 | Ribonuclease PH (EC 2.7.7.56) |
| fig|6666666.692457.peg.37 | CDS | VC-22 | 27077 | 25938 | -2 | - | 1140 | POSSIBLE LINOLEOYL-CoA DESATURASE (DELTA(6)-DESATURASE) |
| fig|6666666.692457.peg.38 | CDS | VC-22 | 28219 | 27197 | -1 | - | 1023 | Flavodoxin reductases (ferredoxin-NADPH reductases) family 1 |
| fig|6666666.692457.peg.39 | CDS | VC-22 | 28394 | 29038 | 2 | + | 645 | Unsaturated fatty acid biosythesis repressor FabR, TetR family |
| fig|6666666.692457.peg.40 | CDS | VC-22 | 29736 | 29119 | -3 | - | 618 | Periplasmic thiol:disulfide interchange protein DsbA |
| fig|6666666.692457.peg.41 | CDS | VC-22 | 29966 | 30679 | 2 | + | 714 | 3-demethylubiquinone-9 3-methyltransferase (EC 2.1.1.64) |
| fig|6666666.692457.peg.42 | CDS | VC-22 | 30679 | 31350 | 1 | + | 672 | Similar to phosphoglycolate phosphatase, clustered with ubiquinone biosynthesis SAM-dependent O-methyltransferase |
| fig|6666666.692457.peg.43 | CDS | VC-22 | 31612 | 32358 | 1 | + | 747 | Oxidoreductase, short-chain dehydrogenase/reductase family |
| fig|6666666.692457.peg.44 | CDS | VC-22 | 32586 | 32741 | 3 | + | 156 | hypothetical protein |
| fig|6666666.692457.peg.45 | CDS | VC-22 | 33023 | 33424 | 2 | + | 402 | putative signal peptide |
| fig|6666666.692457.peg.46 | CDS | VC-22 | 33623 | 33919 | 2 | + | 297 | conserved hypothetical protein; putative signal peptide |
| fig|6666666.692457.peg.47 | CDS | VC-22 | 34112 | 34474 | 2 | + | 363 | conserved hypothetical protein; putative signal peptide |
| fig|6666666.692457.peg.48 | CDS | VC-22 | 35230 | 36585 | 1 | + | 1356 | N-acetylglutamate synthase (EC 2.3.1.1) |
| fig|6666666.692457.peg.49 | CDS | VC-22 | 36921 | 37880 | 3 | + | 960 | Alkanesulfonates-binding protein |
| fig|6666666.692457.peg.50 | CDS | VC-22 | 37915 | 38907 | 1 | + | 993 | Alkanesulfonates-binding protein |
| fig|6666666.692457.peg.51 | CDS | VC-22 | 38930 | 40099 | 2 | + | 1170 | Alkanesulfonate monooxygenase (EC 1.14.14.5) |
| fig|6666666.692457.peg.52 | CDS | VC-22 | 40096 | 40917 | 1 | + | 822 | Alkanesulfonates transport system permease protein |
| fig|6666666.692457.peg.53 | CDS | VC-22 | 40927 | 41724 | 1 | + | 798 | Alkanesulfonates ABC transporter ATP-binding protein / Sulfonate ABC transporter, ATP-binding subunit SsuB |
| fig|6666666.692457.peg.54 | CDS | VC-22 | 42445 | 43131 | 1 | + | 687 | Transcriptional regulator RutR of pyrimidine catabolism (TetR family) |
| fig|6666666.692457.peg.55 | CDS | VC-22 | 43801 | 43235 | -1 | - | 567 | 5&#39;-methylthioadenosine nucleosidase (EC 3.2.2.16) / S-adenosylhomocysteine nucleosidase (EC 3.2.2.9) |
| fig|6666666.692457.peg.56 | CDS | VC-22 | 43961 | 44503 | 2 | + | 543 | putative reductase |
| fig|6666666.692457.peg.57 | CDS | VC-22 | 44996 | 44730 | -2 | - | 267 | FIG00350327: hypothetical protein |
| fig|6666666.692457.peg.58 | CDS | VC-22 | 45799 | 45035 | -1 | - | 765 | Outer membrane protein assembly factor YaeT precursor |
| fig|6666666.692457.peg.59 | CDS | VC-22 | 46763 | 45804 | -2 | - | 960 | FIG00351404: hypothetical protein |
| fig|6666666.692457.peg.60 | CDS | VC-22 | 50703 | 46798 | -3 | - | 3906 | IcmF-related protein |
| fig|6666666.692457.peg.61 | CDS | VC-22 | 52129 | 50738 | -1 | - | 1392 | FIG00350534: hypothetical protein |
| fig|6666666.692457.peg.62 | CDS | VC-22 | 53122 | 52130 | -1 | - | 993 | Uncharacterized protein ImpH/VasB |
| fig|6666666.692457.peg.63 | CDS | VC-22 | 54894 | 53086 | -3 | - | 1809 | Protein ImpG/VasA |
| fig|6666666.692457.peg.64 | CDS | VC-22 | 55385 | 54912 | -2 | - | 474 | Uncharacterized protein ImpF |
| fig|6666666.692457.peg.65 | CDS | VC-22 | 55952 | 55449 | -2 | - | 504 | Putative cytoplasmic protein USSDB7A |
| fig|6666666.692457.peg.66 | CDS | VC-22 | 57480 | 55999 | -3 | - | 1482 | Uncharacterized protein ImpC |
| fig|6666666.692457.peg.67 | CDS | VC-22 | 57982 | 57473 | -1 | - | 510 | Uncharacterized protein ImpB |
| fig|6666666.692457.peg.68 | CDS | VC-22 | 58662 | 58012 | -3 | - | 651 | FIG00350028: hypothetical protein |
| fig|6666666.692457.peg.69 | CDS | VC-22 | 59028 | 61700 | 3 | + | 2673 | ClpB protein |
| fig|6666666.692457.peg.70 | CDS | VC-22 | 61720 | 62823 | 1 | + | 1104 | Uncharacterized protein ImpA |
| fig|6666666.692457.peg.71 | CDS | VC-22 | 62830 | 64194 | 1 | + | 1365 | Uncharacterized protein ImpJ/VasE |
| fig|6666666.692457.peg.72 | CDS | VC-22 | 64209 | 65009 | 3 | + | 801 | Probable transmembrane protein |
| fig|6666666.692457.peg.73 | CDS | VC-22 | 65021 | 65617 | 2 | + | 597 | hypothetical protein |
| fig|6666666.692457.peg.74 | CDS | VC-22 | 65671 | 66597 | 1 | + | 927 | Probable transmembrane protein |
| fig|6666666.692457.peg.75 | CDS | VC-22 | 67175 | 66864 | -2 | - | 312 | FIG00350053: hypothetical protein |
